# Supplementary material for: Late Neogene and Early Quaternary Paleoenvironmental and Paleoclimatic Conditions in Southwestern Europe: Isotopic Analyses on Mammalian Taxa
Source: PLoS One. 2013 May 23;8(5):e63739. doi: 10.1371/journal.pone.0063739 (PMC3662777; doi:10.1371/journal.pone.0063739)
Supplement: Table S4 — Statistical analyses comparing different mammalian taxa per MN. Student-t test was used for those MNs where we sampled two genera, whilst ANOVA test was used for those MNs with more than 2 genera. Significant differences are highlighted in bold. (XLS) [file pone.0063739.s004.xls]

## Sheet: Hoja1
Supplementary Data 4. Statistical analyses comparing different mammalian taxa per MN. Student-t test was used for those MNs where we sampled two genera, whilst ANOVA test was used for those MNs with more than 2 genera. Significant differences are highlighted in bold.
	Student-t test						ANOVA test
	δ13CCO3		δ18OCO3		δ18OPO4		δ13CCO3		δ18OCO3		δ18OPO4
MN	t	p	t	p	t	p	F	p	F	p	F	p
MP	-2.231	0.155	-1.573	0.256	-4.037	0.056
MN17	-	-	-	-	-	-	-	-	-	-	-	-
MN16							0.388	0.813	0.308	0.867	1.875	0.185
MN15	0.363	0.735	-6.349	0.003	-4.403	0.007
MN14	0.543	0.611	-2.623	0.057	-0.691	0.607
MN13							6.406	<0,001	3.03	0.025	7.073	< 0,001
MN12							4.97	0.011	16.686	<0,001	47.092	<0,001
MN11							2.214	0.149	9.679	0.003	3.287	0.073
MN10	-1.603	0.153	-1.658	0.141	-1.809	0.12
MN9	-0.164	0.877	1.622	0.123	0.355	0.727
MN7/8	0.238	0.851	-1.487	0.376	-0.195	0.852
